# Supplementary material for: Cuticular hydrocarbon profile for queen recognition in the termite Reticulitermes speratus
Source: Research Square preprint supplement (doi:10.21203/rs.3.rs-490573/v1), 2021-05-03
Supplement: Supplementary file 1 [file 770acbccdbe1587371c8187e.xlsx]

## Sheet: GC-MS results
Colony	Caste	Compound No	Compound	Area	Relative area to IS per individual (= ng/individual)	Total/caste in each colony (ng/individual)	Percentage [%]
A	PK	19	Tetradecane	489540	0.549586	8.54346	6.43282
A	PK	41	Hexadecane	566928	0.636466	8.54346	7.44974
A	PK	42	Undecyl cyclopentane	573592	0.643947	8.54346	7.53731
A	PK	43	1-Phenyl-1-(3,4-dimethylphenyl)ethane	323589	0.363279	8.54346	4.25213
A	PK	51	3-methyl heptadecane	235788	0.264709	8.54346	3.09838
A	PK	55	5,5-Diethylpentadecane	247244	0.27757	8.54346	3.24892
A	PK	56	3-Octadecene	863234	0.969116	8.54346	11.3434
A	PK	62	Eicosane	229422	0.257562	8.54346	3.01473
A	PK	63	5,5-Diethylheptadecane	342660	0.38469	8.54346	4.50274
A	PK	66	2-Methyl-1-eicosanol	877943	0.985629	8.54346	11.5366
A	PK	68	4,7,16,17-Tetramethyl eicosane	356942	0.400723	8.54346	4.69041
A	PK	70	1-Docosanol	280911	0.315367	8.54346	3.69132
A	PK	71	Tricosane	355762	0.399399	8.54346	4.67491
A	PK	76	4,7,18,19-Tetramethyl docosane	317205	0.356112	8.54346	4.16825
A	PK	82	Pentacosane	1187515	1.33317	8.54346	15.6046
A	PK	83	11-Methylpentacosane	361761	0.406134	8.54346	4.75374
A	Soldier(F)	18	β-Elemene	14712091	12.767	47.6317	26.8035
A	Soldier(F)	71	Tricosane	9711519	8.42754	47.6317	17.6931
A	Soldier(F)	82	Pentacosane	19552280	16.9672	47.6317	35.6217
A	Soldier(F)	83	11-Methylpentacosane	10912724	9.46993	47.6317	19.8816
A	Soldier(M)	18	β-Elemene	260083493	343.365	385.904	88.977
A	Soldier(M)	41	Hexadecane	324933	0.428981	385.904	0.111163
A	Soldier(M)	42	Undecyl cyclopentane	496544	0.655543	385.904	0.169872
A	Soldier(M)	43	1-Phenyl-1-(3,4-dimethylphenyl)ethane	835443	1.10296	385.904	0.285813
A	Soldier(M)	56	3-Octadecene	830780	1.09681	385.904	0.284218
A	Soldier(M)	71	Tricosane	5761801	7.6068	385.904	1.97117
A	Soldier(M)	72	11-Methyltricosane	1495363	1.9742	385.904	0.511578
A	Soldier(M)	75	Tetracosane	929079	1.22658	385.904	0.317847
A	Soldier(M)	77	11-Methyltetracosane	762047	1.00606	385.904	0.260703
A	Soldier(M)	80	2-Methyltetracosane	1113197	1.46966	385.904	0.380835
A	Soldier(M)	82	Pentacosane	11288172	14.9028	385.904	3.86179
A	Soldier(M)	83	11-Methylpentacosane	8383338	11.0678	385.904	2.86802
A	SQ	41	Hexadecane	509228	0.525336	136.147	0.385861
A	SQ	42	Undecyl cyclopentane	571625	0.589707	136.147	0.433141
A	SQ	43	1-Phenyl-1-(3,4-dimethylphenyl)ethane	999922	1.03155	136.147	0.757678
A	SQ	56	3-Octadecene	1329812	1.37188	136.147	1.00765
A	SQ	66	2-Methyl-1-eicosanol	547510	0.564829	136.147	0.414868
A	SQ	71	Tricosane	10227268	10.5508	136.147	7.74958
A	SQ	75	Tetracosane	3744300	3.86274	136.147	2.83719
A	SQ	80	2-Methyltetracosane	5814939	5.99888	136.147	4.40619
A	SQ	82	Pentacosane	79983610	82.5137	136.147	60.6065
A	SQ	83	11-Methylpentacosane	8023265	8.27706	136.147	6.07952
A	SQ	87	2-Methylpentacosane	6402880	6.60542	136.147	4.8517
A	SQ	88	3-Methylpentacosane	3460115	3.56957	136.147	2.62186
A	SQ	91	5,17-DImethylpentacosane	1812078	1.8694	136.147	1.37308
A	SQ	93	Heptacos-1-ene	2833081	2.9227	136.147	2.14673
A	SQ	95	Heptacosane	4521643	4.66468	136.147	3.42622
A	SQ	96	Unknown 4	1190680	1.22834	136.147	0.902222
A	Worker(F)	19	Tetradecane	461685	0.550884	9.62443	5.7238
A	Worker(F)	41	Hexadecane	430978	0.514244	9.62443	5.34311
A	Worker(F)	42	Undecyl cyclopentane	652058	0.778037	9.62443	8.08398
A	Worker(F)	56	3-Octadecene	767183	0.915404	9.62443	9.51126
A	Worker(F)	71	Tricosane	572999	0.683704	9.62443	7.10384
A	Worker(F)	80	2-Methyltetracosane	452750	0.540222	9.62443	5.61303
A	Worker(F)	82	Pentacosane	1974853	2.3564	9.62443	24.4835
A	Worker(F)	83	11-Methylpentacosane	969503	1.15681	9.62443	12.0195
A	Worker(F)	87	2-Methylpentacosane	695641	0.83004	9.62443	8.62431
A	Worker(F)	88	3-Methylpentacosane	489154	0.58366	9.62443	6.06436
A	Worker(F)	91	5,17-DImethylpentacosane	283547	0.338329	9.62443	3.51531
A	Worker(F)	92	Unknown 3	315700	0.376694	9.62443	3.91394
A	Worker(M)	19	Tetradecane	956281	0.53765	12.7579	4.21426
A	Worker(M)	41	Hexadecane	760914	0.427809	12.7579	3.35329
A	Worker(M)	42	Undecyl cyclopentane	1081587	0.608101	12.7579	4.76647
A	Worker(M)	43	1-Phenyl-1-(3,4-dimethylphenyl)ethane	666492	0.374722	12.7579	2.93718
A	Worker(M)	56	3-Octadecene	1553318	0.873323	12.7579	6.84535
A	Worker(M)	63	5,5-Diethylheptadecane	673457	0.378638	12.7579	2.96787
A	Worker(M)	66	2-Methyl-1-eicosanol	1486432	0.835717	12.7579	6.55059
A	Worker(M)	68	4,7,16,17-Tetramethyl eicosane	689471	0.387642	12.7579	3.03845
A	Worker(M)	71	Tricosane	1337351	0.751899	12.7579	5.8936
A	Worker(M)	75	Tetracosane	799202	0.449336	12.7579	3.52202
A	Worker(M)	76	4,7,18,19-Tetramethyl docosane	554113	0.311539	12.7579	2.44193
A	Worker(M)	80	2-Methyltetracosane	1229236	0.691114	12.7579	5.41715
A	Worker(M)	82	Pentacosane	5301886	2.98088	12.7579	23.365
A	Worker(M)	83	11-Methylpentacosane	2578353	1.44963	12.7579	11.3626
A	Worker(M)	87	2-Methylpentacosane	2028127	1.14027	12.7579	8.9378
A	Worker(M)	88	3-Methylpentacosane	995352	0.559617	12.7579	4.38644
B	PK	1	3,4-Dimethyl decane	304359	1.76081	38.6655	4.55394
B	PK	2	4,6-Dimethyl decane	127189	0.735826	38.6655	1.90305
B	PK	3	Undecane	70057	0.4053	38.6655	1.04822
B	PK	4	4,7-Dimethyl decane	140071	0.810352	38.6655	2.0958
B	PK	5	2,3,6,7-tetramethyl octane	62844	0.363571	38.6655	0.940297
B	PK	6	Dodcane	350295	2.02656	38.6655	5.24126
B	PK	7	2,8-Dimethyl undecane	39930	0.231007	38.6655	0.597449
B	PK	9	2,7,10- or 2,6,10-trimethyl dodecane	413569	2.39262	38.6655	6.18799
B	PK	9	2,7,10- or 2,6,10-trimethyl dodecane	34762	0.201108	38.6655	0.520123
B	PK	10	Tridecane	117853	0.681815	38.6655	1.76336
B	PK	12	4,7-Dimethyl dodecane	64417	0.372671	38.6655	0.963833
B	PK	13	3-Ethyl dodecane	80946	0.468297	38.6655	1.21115
B	PK	14	2,6,11-trimethyl dodecane	317822	1.83869	38.6655	4.75538
B	PK	15	4,8-Dimethyl dodecane	129646	0.75004	38.6655	1.93982
B	PK	16	3-Ethyl-2,6,10-trimethyl undecane	43992	0.254507	38.6655	0.658226
B	PK	17	4,6-Dimethyl dodecane	69957	0.404722	38.6655	1.04673
B	PK	19	Tetradecane	151078	0.874031	38.6655	2.26049
B	PK	25	2,6,10,15-tetramethyl heptadecane	196911	1.13919	38.6655	2.94626
B	PK	26	4-Methyl nonadecane	60257	0.348605	38.6655	0.90159
B	PK	28	(-)-β-Cadinene	33171	0.191904	38.6655	0.496318
B	PK	29	δ-Cadinene	39022	0.225754	38.6655	0.583863
B	PK	30	5,6-Dimethyl octadecane	51897	0.30024	38.6655	0.776504
B	PK	31	2,6,11,15-tetramethyl hexadecane	241865	1.39926	38.6655	3.61888
B	PK	33	4,10-Dimethyloctadecane	83641	0.483888	38.6655	1.25147
B	PK	36	4,6-Dimethyloctadecane	74410	0.430484	38.6655	1.11335
B	PK	37	5,10-Dimethyloctadecane	85949	0.49724	38.6655	1.286
B	PK	38	5,8,10-Trimethyl heptadecane	53846	0.311515	38.6655	0.805666
B	PK	40	5,7-Dimethyl tetradecane	58079	0.336004	38.6655	0.869002
B	PK	41	Hexadecane	95805	0.55426	38.6655	1.43347
B	PK	42	Undecyl cyclopentane	75102	0.434487	38.6655	1.12371
B	PK	43	1-Phenyl-1-(3,4-dimethylphenyl)ethane	116414	0.673489	38.6655	1.74183
B	PK	44	2,2',5,5'-tetramethyl biphenyl	47400	0.274223	38.6655	0.709218
B	PK	45	Unknown 1	38894	0.225013	38.6655	0.581948
B	PK	47	4,6,11-Trimethyl pentadecane	224777	1.3004	38.6655	3.3632
B	PK	49	5,13-Dimethylnonadecane	19636	0.1136	38.6655	0.293802
B	PK	50	2,6,10,14-tetramethyl hexadecane	182931	1.05831	38.6655	2.73709
B	PK	51	3-methyl heptadecane	88051	0.509401	38.6655	1.31745
B	PK	52	5,7-Dimethyl heptadecane	59425	0.343791	38.6655	0.889141
B	PK	53	Unknown 2	55268	0.319742	38.6655	0.826942
B	PK	55	5,5-Diethylpentadecane	61558	0.356131	38.6655	0.921056
B	PK	56	3-Octadecene	102209	0.591309	38.6655	1.52929
B	PK	59	5,9-Dimethyl tricosane	91863	0.531455	38.6655	1.37449
B	PK	60	5,9,11-Trimethyl octadecane	88066	0.509488	38.6655	1.31768
B	PK	63	5,5-Diethylheptadecane	51860	0.300025	38.6655	0.77595
B	PK	66	2-Methyl-1-eicosanol	93740	0.542314	38.6655	1.40258
B	PK	71	Tricosane	253570	1.46698	38.6655	3.79402
B	PK	75	Tetracosane	73470	0.425046	38.6655	1.09929
B	PK	80	2-Methyltetracosane	181599	1.0506	38.6655	2.71716
B	PK	82	Pentacosane	731047	4.22932	38.6655	10.9382
B	PK	83	11-Methylpentacosane	292953	1.69482	38.6655	4.38328
B	PK	88	3-Methylpentacosane	159944	0.925323	38.6655	2.39315
B	Soldier(F)	18	β-Elemene	180057617	363.392	2664.82	13.6366
B	Soldier(F)	58	β-Springene	13134561	26.5081	2664.82	0.994744
B	Soldier(F)	64	Geranyl linalool	1084720571	2189.18	2664.82	82.1511
B	Soldier(F)	71	Tricosane	11367791	22.9424	2664.82	0.860938
B	Soldier(F)	82	Pentacosane	11022398	22.2454	2664.82	0.834779
B	Soldier(F)	83	11-Methylpentacosane	20093524	40.5527	2664.82	1.52178
B	Soldier(M)	18	β-Elemene	44760202	156.581	2011.86	7.78291
B	Soldier(M)	58	β-Springene	6244861	21.8459	2011.86	1.08586
B	Soldier(M)	64	Geranyl linalool	490000000	1714.13	2011.86	85.2013
B	Soldier(M)	71	Tricosane	3686129	12.8949	2011.86	0.640945
B	Soldier(M)	72	11-Methyltricosane	923811	3.2317	2011.86	0.160632
B	Soldier(M)	73	2-methyltricosane	984181	3.44289	2011.86	0.17113
B	Soldier(M)	75	Tetracosane	825110	2.88642	2011.86	0.14347
B	Soldier(M)	77	11-Methyltetracosane	499541	1.74751	2011.86	0.0868603
B	Soldier(M)	80	2-Methyltetracosane	2401573	8.40125	2011.86	0.417586
B	Soldier(M)	82	Pentacosane	6122247	21.417	2011.86	1.06454
B	Soldier(M)	83	11-Methylpentacosane	7720624	27.0085	2011.86	1.34246
B	Soldier(M)	86	x,y-Pentacosadiene	1025020	3.58575	2011.86	0.178231
B	Soldier(M)	87	2-Methylpentacosane	1124466	3.93364	2011.86	0.195522
B	Soldier(M)	88	3-Methylpentacosane	1518611	5.31245	2011.86	0.264056
B	Soldier(M)	91	5,17-DImethylpentacosane	1483488	5.18958	2011.86	0.257949
B	Soldier(M)	92	Unknown 3	2387235	8.35109	2011.86	0.415093
B	Soldier(M)	94	x-Heptacosene	1474578	5.15841	2011.86	0.2564
B	Soldier(M)	96	Unknown 4	1926882	6.74067	2011.86	0.335047
B	SQ	1	3,4-Dimethyl decane	375395	1.19725	75.6496	1.58262
B	SQ	6	Dodcane	499015	1.59151	75.6496	2.10379
B	SQ	9	2,7,10- or 2,6,10-trimethyl dodecane	479068	1.52789	75.6496	2.01969
B	SQ	14	2,6,11-trimethyl dodecane	385533	1.22958	75.6496	1.62536
B	SQ	19	Tetradecane	167879	0.535416	75.6496	0.707757
B	SQ	25	2,6,10,15-tetramethyl heptadecane	570803	1.82046	75.6496	2.40644
B	SQ	28	(-)-β-Cadinene	118693	0.378547	75.6496	0.500395
B	SQ	31	2,6,11,15-tetramethyl hexadecane	249887	0.796963	75.6496	1.05349
B	SQ	41	Hexadecane	86946	0.277296	75.6496	0.366554
B	SQ	42	Undecyl cyclopentane	149743	0.477574	75.6496	0.631298
B	SQ	43	1-Phenyl-1-(3,4-dimethylphenyl)ethane	187641	0.598442	75.6496	0.791072
B	SQ	44	2,2',5,5'-tetramethyl biphenyl	168721	0.538101	75.6496	0.711307
B	SQ	47	4,6,11-Trimethyl pentadecane	197688	0.630485	75.6496	0.833429
B	SQ	50	2,6,10,14-tetramethyl hexadecane	232512	0.741549	75.6496	0.980242
B	SQ	55	5,5-Diethylpentadecane	94557	0.30157	75.6496	0.398641
B	SQ	56	3-Octadecene	170892	0.545025	75.6496	0.72046
B	SQ	63	5,5-Diethylheptadecane	113053	0.360559	75.6496	0.476618
B	SQ	66	2-Methyl-1-eicosanol	180937	0.577061	75.6496	0.762808
B	SQ	71	Tricosane	2014568	6.42505	75.6496	8.49317
B	SQ	75	Tetracosane	780852	2.49037	75.6496	3.29198
B	SQ	80	2-Methyltetracosane	1271210	4.05426	75.6496	5.35927
B	SQ	82	Pentacosane	8563784	27.3124	75.6496	36.1039
B	SQ	83	11-Methylpentacosane	2315744	7.38559	75.6496	9.7629
B	SQ	87	2-Methylpentacosane	1095735	3.49462	75.6496	4.61949
B	SQ	88	3-Methylpentacosane	1254336	4.00045	75.6496	5.28813
B	SQ	91	5,17-DImethylpentacosane	590234	1.88243	75.6496	2.48835
B	SQ	92	Unknown 3	888779	2.83458	75.6496	3.74698
B	SQ	95	Heptacosane	515643	1.64454	75.6496	2.17389
B	Worker(F)	1	3,4-Dimethyl decane	1052674	1.11638	16.5059	6.76352
B	Worker(F)	6	Dodcane	1163081	1.23347	16.5059	7.47289
B	Worker(F)	9	2,7,10- or 2,6,10-trimethyl dodecane	1227251	1.30152	16.5059	7.88519
B	Worker(F)	14	2,6,11-trimethyl dodecane	987601	1.04737	16.5059	6.34542
B	Worker(F)	19	Tetradecane	430959	0.45704	16.5059	2.76895
B	Worker(F)	25	2,6,10,15-tetramethyl heptadecane	1347616	1.42917	16.5059	8.65854
B	Worker(F)	31	2,6,11,15-tetramethyl hexadecane	811546	0.860659	16.5059	5.21425
B	Worker(F)	41	Hexadecane	495797	0.525801	16.5059	3.18554
B	Worker(F)	42	Undecyl cyclopentane	505033	0.535596	16.5059	3.24488
B	Worker(F)	47	4,6,11-Trimethyl pentadecane	446009	0.473	16.5059	2.86564
B	Worker(F)	50	2,6,10,14-tetramethyl hexadecane	706389	0.749138	16.5059	4.53861
B	Worker(F)	51	3-methyl heptadecane	446845	0.473887	16.5059	2.87102
B	Worker(F)	56	3-Octadecene	858888	0.910866	16.5059	5.51843
B	Worker(F)	63	5,5-Diethylheptadecane	346150	0.367098	16.5059	2.22404
B	Worker(F)	66	2-Methyl-1-eicosanol	916945	0.972436	16.5059	5.89145
B	Worker(F)	68	4,7,16,17-Tetramethyl eicosane	299187	0.317293	16.5059	1.9223
B	Worker(F)	71	Tricosane	533845	0.566152	16.5059	3.43
B	Worker(F)	76	4,7,18,19-Tetramethyl docosane	300876	0.319084	16.5059	1.93315
B	Worker(F)	80	2-Methyltetracosane	400062	0.424273	16.5059	2.57043
B	Worker(F)	82	Pentacosane	1194334	1.26661	16.5059	7.6737
B	Worker(F)	83	11-Methylpentacosane	756503	0.802285	16.5059	4.86059
B	Worker(F)	88	3-Methylpentacosane	336410	0.356769	16.5059	2.16146
B	Worker(M)	1	3,4-Dimethyl decane	1098789	1.03036	17.7862	5.79303
B	Worker(M)	6	Dodcane	1128028	1.05778	17.7862	5.94718
B	Worker(M)	9	2,7,10- or 2,6,10-trimethyl dodecane	1286773	1.20664	17.7862	6.78412
B	Worker(M)	14	2,6,11-trimethyl dodecane	1033288	0.96894	17.7862	5.4477
B	Worker(M)	19	Tetradecane	570351	0.534832	17.7862	3.007
B	Worker(M)	25	2,6,10,15-tetramethyl heptadecane	1669564	1.56559	17.7862	8.80227
B	Worker(M)	31	2,6,11,15-tetramethyl hexadecane	818190	0.767237	17.7862	4.31366
B	Worker(M)	41	Hexadecane	599337	0.562013	17.7862	3.15982
B	Worker(M)	42	Undecyl cyclopentane	771252	0.723222	17.7862	4.06619
B	Worker(M)	50	2,6,10,14-tetramethyl hexadecane	768070	0.720238	17.7862	4.04942
B	Worker(M)	51	3-methyl heptadecane	553332	0.518873	17.7862	2.91727
B	Worker(M)	56	3-Octadecene	1188362	1.11436	17.7862	6.26528
B	Worker(M)	63	5,5-Diethylheptadecane	506529	0.474985	17.7862	2.67052
B	Worker(M)	66	2-Methyl-1-eicosanol	1249269	1.17147	17.7862	6.58639
B	Worker(M)	68	4,7,16,17-Tetramethyl eicosane	538176	0.504661	17.7862	2.83737
B	Worker(M)	71	Tricosane	712750	0.668363	17.7862	3.75776
B	Worker(M)	76	4,7,18,19-Tetramethyl docosane	412840	0.38713	17.7862	2.17657
B	Worker(M)	80	2-Methyltetracosane	591007	0.554202	17.7862	3.1159
B	Worker(M)	82	Pentacosane	1742400	1.63389	17.7862	9.18627
B	Worker(M)	83	11-Methylpentacosane	1207997	1.13277	17.7862	6.3688
B	Worker(M)	88	3-Methylpentacosane	521126	0.488673	17.7862	2.74748
C	PK	1	3,4-Dimethyl decane	518417	1.76361	24.3766	7.23486
C	PK	6	Dodcane	540018	1.8371	24.3766	7.53632
C	PK	7	2,8-Dimethyl undecane	608778	2.07101	24.3766	8.49591
C	PK	14	2,6,11-trimethyl dodecane	499142	1.69804	24.3766	6.96586
C	PK	25	2,6,10,15-tetramethyl heptadecane	832650	2.83261	24.3766	11.6202
C	PK	31	2,6,11,15-tetramethyl hexadecane	465172	1.58248	24.3766	6.49179
C	PK	42	Undecyl cyclopentane	233036	0.792769	24.3766	3.25217
C	PK	47	4,6,11-Trimethyl pentadecane	208392	0.708932	24.3766	2.90825
C	PK	50	2,6,10,14-tetramethyl hexadecane	393248	1.3378	24.3766	5.48804
C	PK	51	3-methyl heptadecane	207191	0.704846	24.3766	2.89149
C	PK	55	5,5-Diethylpentadecane	159333	0.542037	24.3766	2.2236
C	PK	56	3-Octadecene	390050	1.32692	24.3766	5.44341
C	PK	59	5,9-Dimethyl tricosane	150872	0.513254	24.3766	2.10552
C	PK	63	5,5-Diethylheptadecane	235832	0.802281	24.3766	3.29119
C	PK	65	3,3-Diethylheptadecane	398400	1.35532	24.3766	5.55994
C	PK	68	4,7,16,17-Tetramethyl eicosane	239452	0.814596	24.3766	3.34171
C	PK	71	Tricosane	205699	0.699771	24.3766	2.87067
C	PK	76	4,7,18,19-Tetramethyl docosane	196254	0.66764	24.3766	2.73886
C	PK	82	Pentacosane	505845	1.72084	24.3766	7.05941
C	PK	83	11-Methylpentacosane	177763	0.604735	24.3766	2.4808
C	Soldier(F)	1	3,4-Dimethyl decane	1555637	1.34867	96.3575	1.39966
C	Soldier(F)	6	Dodcane	1639858	1.42169	96.3575	1.47543
C	Soldier(F)	7	2,8-Dimethyl undecane	2004104	1.73748	96.3575	1.80316
C	Soldier(F)	14	2,6,11-trimethyl dodecane	1545470	1.33986	96.3575	1.39051
C	Soldier(F)	18	β-Elemene	72895659	63.1976	96.3575	65.5865
C	Soldier(F)	31	2,6,11,15-tetramethyl hexadecane	1122396	0.973071	96.3575	1.00986
C	Soldier(F)	50	2,6,10,14-tetramethyl hexadecane	955407	0.828299	96.3575	0.85961
C	Soldier(F)	56	3-Octadecene	1026032	0.889528	96.3575	0.923154
C	Soldier(F)	71	Tricosane	4707859	4.08152	96.3575	4.23581
C	Soldier(F)	75	Tetracosane	1099247	0.953002	96.3575	0.989027
C	Soldier(F)	80	2-Methyltetracosane	2343816	2.03199	96.3575	2.10881
C	Soldier(F)	82	Pentacosane	7698805	6.67455	96.3575	6.92686
C	Soldier(F)	83	11-Methylpentacosane	6152432	5.33391	96.3575	5.53554
C	Soldier(F)	85	x,x-Pentacosadiene	1055635	0.915192	96.3575	0.949788
C	Soldier(F)	87	2-Methylpentacosane	1552092	1.3456	96.3575	1.39647
C	Soldier(F)	88	3-Methylpentacosane	1730752	1.50049	96.3575	1.55721
C	Soldier(F)	96	Unknown 4	2059033	1.7851	96.3575	1.85258
C	Soldier(M)	1	3,4-Dimethyl decane	904293	2.19824	61.4135	3.5794
C	Soldier(M)	4	4,7-Dimethyl decane	318674	0.774661	61.4135	1.26139
C	Soldier(M)	6	Dodcane	996009	2.42119	61.4135	3.94244
C	Soldier(M)	7	2,8-Dimethyl undecane	1036284	2.51909	61.4135	4.10186
C	Soldier(M)	10	Tridecane	204963	0.498242	61.4135	0.811292
C	Soldier(M)	14	2,6,11-trimethyl dodecane	859301	2.08887	61.4135	3.40131
C	Soldier(M)	18	β-Elemene	10640526	25.8659	61.4135	42.1177
C	Soldier(M)	25	2,6,10,15-tetramethyl heptadecane	787790	1.91503	61.4135	3.11826
C	Soldier(M)	31	2,6,11,15-tetramethyl hexadecane	714197	1.73613	61.4135	2.82696
C	Soldier(M)	47	4,6,11-Trimethyl pentadecane	466673	1.13443	61.4135	1.8472
C	Soldier(M)	50	2,6,10,14-tetramethyl hexadecane	542706	1.31926	61.4135	2.14816
C	Soldier(M)	51	3-methyl heptadecane	181265	0.440635	61.4135	0.717489
C	Soldier(M)	59	5,9-Dimethyl tricosane	190334	0.462681	61.4135	0.753387
C	Soldier(M)	60	5,9,11-Trimethyl octadecane	232976	0.566339	61.4135	0.922174
C	Soldier(M)	71	Tricosane	1143944	2.7808	61.4135	4.528
C	Soldier(M)	75	Tetracosane	254434	0.618501	61.4135	1.00711
C	Soldier(M)	80	2-Methyltetracosane	658425	1.60056	61.4135	2.6062
C	Soldier(M)	82	Pentacosane	2067684	5.02631	61.4135	8.18438
C	Soldier(M)	83	11-Methylpentacosane	2071002	5.03438	61.4135	8.19751
C	Soldier(M)	87	2-Methylpentacosane	491281	1.19425	61.4135	1.94461
C	Soldier(M)	88	3-Methylpentacosane	501028	1.21794	61.4135	1.98319
C	SQ	1	3,4-Dimethyl decane	887580	2.57764	111.032	2.32154
C	SQ	4	4,7-Dimethyl decane	306766	0.890886	111.032	0.802372
C	SQ	6	Dodcane	963080	2.7969	111.032	2.51902
C	SQ	7	2,8-Dimethyl undecane	984850	2.86013	111.032	2.57596
C	SQ	10	Tridecane	201891	0.586316	111.032	0.528063
C	SQ	14	2,6,11-trimethyl dodecane	826956	2.40158	111.032	2.16297
C	SQ	19	Tetradecane	191840	0.557127	111.032	0.501773
C	SQ	25	2,6,10,15-tetramethyl heptadecane	841906	2.445	111.032	2.20207
C	SQ	31	2,6,11,15-tetramethyl hexadecane	768800	2.23269	111.032	2.01086
C	SQ	47	4,6,11-Trimethyl pentadecane	432753	1.25677	111.032	1.1319
C	SQ	50	2,6,10,14-tetramethyl hexadecane	500735	1.4542	111.032	1.30971
C	SQ	51	3-methyl heptadecane	176278	0.511933	111.032	0.46107
C	SQ	59	5,9-Dimethyl tricosane	161440	0.468842	111.032	0.42226
C	SQ	60	5,9,11-Trimethyl octadecane	205426	0.596582	111.032	0.537309
C	SQ	71	Tricosane	4448359	12.9186	111.032	11.635
C	SQ	73	2-methyltricosane	171469	0.497967	111.032	0.448491
C	SQ	75	Tetracosane	940537	2.73144	111.032	2.46005
C	SQ	80	2-Methyltetracosane	1914221	5.55913	111.032	5.0068
C	SQ	81	Pentacos-1-ene	495923	1.44022	111.032	1.29713
C	SQ	82	Pentacosane	12723831	36.9516	111.032	33.2802
C	SQ	83	11-Methylpentacosane	2842386	8.25464	111.032	7.43449
C	SQ	85	x,x-Pentacosadiene	113475	0.329545	111.032	0.296803
C	SQ	87	2-Methylpentacosane	1259952	3.65906	111.032	3.29551
C	SQ	88	3-Methylpentacosane	1254717	3.64385	111.032	3.28182
C	SQ	92	Unknown 3	1587943	4.61158	111.032	4.1534
C	SQ	92	Unknown 3	351840	1.02179	111.032	0.920267
C	SQ	92	Unknown 3	288158	0.836846	111.032	0.753701
C	SQ	93	Heptacos-1-ene	1438693	4.17814	111.032	3.76302
C	SQ	95	Heptacosane	515585	1.49732	111.032	1.34856
C	SQ	96	Unknown 4	435012	1.26333	111.032	1.13781
C	Worker(F)	1	3,4-Dimethyl decane	948505	1.45512	19.1377	7.60344
C	Worker(F)	6	Dodcane	1018989	1.56325	19.1377	8.16846
C	Worker(F)	7	2,8-Dimethyl undecane	1091668	1.67475	19.1377	8.75107
C	Worker(F)	14	2,6,11-trimethyl dodecane	858743	1.31742	19.1377	6.88389
C	Worker(F)	25	2,6,10,15-tetramethyl heptadecane	1377641	2.11347	19.1377	11.0435
C	Worker(F)	31	2,6,11,15-tetramethyl hexadecane	737344	1.13118	19.1377	5.91072
C	Worker(F)	42	Undecyl cyclopentane	601073	0.922119	19.1377	4.81834
C	Worker(F)	43	1-Phenyl-1-(3,4-dimethylphenyl)ethane	372949	0.572149	19.1377	2.98965
C	Worker(F)	50	2,6,10,14-tetramethyl hexadecane	519068	0.796313	19.1377	4.16097
C	Worker(F)	51	3-methyl heptadecane	331400	0.508408	19.1377	2.65658
C	Worker(F)	55	5,5-Diethylpentadecane	321776	0.493643	19.1377	2.57943
C	Worker(F)	56	3-Octadecene	833654	1.27893	19.1377	6.68277
C	Worker(F)	63	5,5-Diethylheptadecane	439950	0.674937	19.1377	3.52674
C	Worker(F)	66	2-Methyl-1-eicosanol	720608	1.1055	19.1377	5.77656
C	Worker(F)	68	4,7,16,17-Tetramethyl eicosane	374077	0.573879	19.1377	2.99869
C	Worker(F)	70	1-Docosanol	447354	0.686295	19.1377	3.5861
C	Worker(F)	71	Tricosane	297390	0.456232	19.1377	2.38395
C	Worker(F)	82	Pentacosane	746573	1.14533	19.1377	5.98471
C	Worker(F)	83	11-Methylpentacosane	435921	0.668756	19.1377	3.49445
C	Worker(M)	1	3,4-Dimethyl decane	1434074	1.8406	17.0115	10.8197
C	Worker(M)	6	Dodcane	1489755	1.91206	17.0115	11.2398
C	Worker(M)	7	2,8-Dimethyl undecane	1653414	2.12211	17.0115	12.4746
C	Worker(M)	14	2,6,11-trimethyl dodecane	1317533	1.69102	17.0115	9.94043
C	Worker(M)	31	2,6,11,15-tetramethyl hexadecane	875758	1.12401	17.0115	6.60736
C	Worker(M)	50	2,6,10,14-tetramethyl hexadecane	854364	1.09655	17.0115	6.44595
C	Worker(M)	71	Tricosane	803493	1.03126	17.0115	6.06214
C	Worker(M)	75	Tetracosane	460246	0.590714	17.0115	3.47243
C	Worker(M)	80	2-Methyltetracosane	671424	0.861756	17.0115	5.06571
C	Worker(M)	82	Pentacosane	2291733	2.94138	17.0115	17.2905
C	Worker(M)	83	11-Methylpentacosane	993416	1.27502	17.0115	7.49506
C	Worker(M)	98	Unknown 5	409075	0.525037	17.0115	3.08636
D	PK	19	Tetradecane	216973	0.208394	21.5878	0.965333
D	PK	23	Pentadecane	322679	0.30992	21.5878	1.43563
D	PK	41	Hexadecane	428158	0.411229	21.5878	1.90492
D	PK	46	Heptadecane	391822	0.376329	21.5878	1.74325
D	PK	57	Nonadecane	470436	0.451835	21.5878	2.09301
D	PK	62	Eicosane	417793	0.401273	21.5878	1.8588
D	PK	67	Docosane	406924	0.390834	21.5878	1.81044
D	PK	71	Tricosane	5087042	4.8859	21.5878	22.6327
D	PK	73	2-methyltricosane	299023	0.2872	21.5878	1.33038
D	PK	75	Tetracosane	946247	0.908832	21.5878	4.20994
D	PK	80	2-Methyltetracosane	1722778	1.65466	21.5878	7.6648
D	PK	81	Pentacos-1-ene	1029794	0.989076	21.5878	4.58165
D	PK	82	Pentacosane	4439204	4.26368	21.5878	19.7504
D	PK	83	11-Methylpentacosane	1885448	1.8109	21.5878	8.38854
D	PK	84	5,6,19-Trimethyltricosane	359490	0.345276	21.5878	1.5994
D	PK	87	2-Methylpentacosane	294530	0.282884	21.5878	1.31039
D	PK	88	3-Methylpentacosane	805130	0.773295	21.5878	3.5821
D	PK	90	4,8-Dimethylpentacosane	1868139	1.79427	21.5878	8.31153
D	PK	93	Heptacos-1-ene	394633	0.379029	21.5878	1.75576
D	PK	95	Heptacosane	527012	0.506174	21.5878	2.34473
D	PK	99	Nonacosane	163231	0.156777	21.5878	0.72623
D	Soldier(F)	11	Triacetin	1797994	1.74878	2170.31	0.0805775
D	Soldier(F)	18	β-Elemene	2145734346	2087.01	2170.31	96.1616
D	Soldier(F)	20	Longifolene	1688403	1.64219	2170.31	0.0756662
D	Soldier(F)	21	(E)-βFarnesene	947019	0.9211	2170.31	0.0424409
D	Soldier(F)	24	β-Selinene	3218732	3.13064	2170.31	0.144248
D	Soldier(F)	27	Naphthalene, 1,2,3,4,4a,5,6,8a-octahydro-4a,8-dimethyl-2-(1-methylethenyl)-, [2R-(2α,4aα,8aβ)]-	3086492	3.00202	2170.31	0.138322
D	Soldier(F)	61	1,3,6,10-Cyclotetradecatetraene, 3,7,11-trimethyl-14-(1-methylethyl)-, [S-(E,Z,E,E)]-	949302	0.923321	2170.31	0.0425432
D	Soldier(F)	69	trans-Geranylgeraniol	1684941	1.63883	2170.31	0.075511
D	Soldier(F)	71	Tricosane	14977040	14.5671	2170.31	0.6712
D	Soldier(F)	72	11-Methyltricosane	3797636	3.6937	2170.31	0.170192
D	Soldier(F)	73	2-methyltricosane	1746829	1.69902	2170.31	0.0782846
D	Soldier(F)	74	Hexadecyl acetate	1860961	1.81003	2170.31	0.0833994
D	Soldier(F)	75	Tetracosane	1536697	1.49464	2170.31	0.0688674
D	Soldier(F)	77	11-Methyltetracosane	1878779	1.82736	2170.31	0.0841979
D	Soldier(F)	80	2-Methyltetracosane	2633053	2.56099	2170.31	0.118001
D	Soldier(F)	81	Pentacos-1-ene	4157067	4.04329	2170.31	0.1863
D	Soldier(F)	82	Pentacosane	8580674	8.34583	2170.31	0.384545
D	Soldier(F)	83	11-Methylpentacosane	16802096	16.3422	2170.31	0.75299
D	Soldier(F)	84	5,6,19-Trimethyltricosane	900495	0.875849	2170.31	0.0403559
D	Soldier(F)	88	3-Methylpentacosane	2722321	2.64781	2170.31	0.122001
D	Soldier(F)	90	4,8-Dimethylpentacosane	6810311	6.62392	2170.31	0.305206
D	Soldier(F)	93	Heptacos-1-ene	3872616	3.76663	2170.31	0.173552
D	Soldier(M)	11	Triacetin	1856789	1.78679	247.49	0.721966
D	Soldier(M)	18	β-Elemene	203660335	195.983	247.49	79.1883
D	Soldier(M)	22	Cyclohexane, 1-ethenyl-1-methyl-2,4-bis(1-methylethenyl)-	1831702	1.76265	247.49	0.712212
D	Soldier(M)	69	trans-Geranylgeraniol	1088549	1.04751	247.49	0.423255
D	Soldier(M)	71	Tricosane	10068815	9.68925	247.49	3.91501
D	Soldier(M)	72	11-Methyltricosane	1590906	1.53093	247.49	0.618584
D	Soldier(M)	73	2-methyltricosane	556723	0.535736	247.49	0.216468
D	Soldier(M)	74	Hexadecyl acetate	524111	0.504353	247.49	0.203788
D	Soldier(M)	75	Tetracosane	1211502	1.16583	247.49	0.471062
D	Soldier(M)	77	11-Methyltetracosane	493332	0.474735	247.49	0.19182
D	Soldier(M)	80	2-Methyltetracosane	2007480	1.9318	247.49	0.780559
D	Soldier(M)	81	Pentacos-1-ene	832436	0.801055	247.49	0.323672
D	Soldier(M)	82	Pentacosane	9253886	8.90504	247.49	3.59814
D	Soldier(M)	83	11-Methylpentacosane	9571659	9.21083	247.49	3.7217
D	Soldier(M)	84	5,6,19-Trimethyltricosane	2144140	2.06331	247.49	0.833695
D	Soldier(M)	87	2-Methylpentacosane	656385	0.631641	247.49	0.255219
D	Soldier(M)	88	3-Methylpentacosane	1185086	1.14041	247.49	0.460791
D	Soldier(M)	90	4,8-Dimethylpentacosane	7812705	7.51819	247.49	3.03778
D	Soldier(M)	93	Heptacos-1-ene	838495	0.806886	247.49	0.326028
D	SQ	11	Triacetin	2064663	1.83378	126.215	1.4529
D	SQ	19	Tetradecane	908916	0.807274	126.215	0.639602
D	SQ	23	Pentadecane	708542	0.629308	126.215	0.4986
D	SQ	71	Tricosane	26801482	23.8043	126.215	18.8601
D	SQ	73	2-methyltricosane	2035282	1.80768	126.215	1.43222
D	SQ	75	Tetracosane	3622701	3.21758	126.215	2.54929
D	SQ	80	2-Methyltetracosane	9475680	8.41604	126.215	6.66802
D	SQ	81	Pentacos-1-ene	10896461	9.67794	126.215	7.66782
D	SQ	82	Pentacosane	39440767	35.0302	126.215	27.7544
D	SQ	83	11-Methylpentacosane	15256289	13.5502	126.215	10.7358
D	SQ	84	5,6,19-Trimethyltricosane	4169549	3.70328	126.215	2.9341
D	SQ	87	2-Methylpentacosane	1541220	1.36887	126.215	1.08455
D	SQ	88	3-Methylpentacosane	5525583	4.90767	126.215	3.88834
D	SQ	90	4,8-Dimethylpentacosane	14753649	13.1038	126.215	10.3821
D	SQ	93	Heptacos-1-ene	4160444	3.69519	126.215	2.9277
D	SQ	97	5,10,17-Trimethylpentacosane	745206	0.661872	126.215	0.5244
D	Worker(F)	19	Tetradecane	547767	0.488627	19.815	2.46595
D	Worker(F)	23	Pentadecane	394566	0.351966	19.815	1.77627
D	Worker(F)	71	Tricosane	2246565	2.00401	19.815	10.1136
D	Worker(F)	72	11-Methyltricosane	279555	0.249373	19.815	1.25851
D	Worker(F)	73	2-methyltricosane	424830	0.378963	19.815	1.91251
D	Worker(F)	75	Tetracosane	419996	0.374651	19.815	1.89075
D	Worker(F)	77	11-Methyltetracosane	409757	0.365517	19.815	1.84465
D	Worker(F)	78	4-Methyltetracosane	1511017	1.34788	19.815	6.80233
D	Worker(F)	82	Pentacosane	2528542	2.25555	19.815	11.383
D	Worker(F)	83	11-Methylpentacosane	5267132	4.69846	19.815	23.7117
D	Worker(F)	84	5,6,19-Trimethyltricosane	1038562	0.926433	19.815	4.67542
D	Worker(F)	87	2-Methylpentacosane	538309	0.48019	19.815	2.42337
D	Worker(F)	88	3-Methylpentacosane	939901	0.838424	19.815	4.23127
D	Worker(F)	90	4,8-Dimethylpentacosane	5666736	5.05492	19.815	25.5106
D	Worker(M)	8	4,8-Dimethyldodecane	330832	0.284504	15.3065	1.85872
D	Worker(M)	11	Triacetin	225198	0.193663	15.3065	1.26523
D	Worker(M)	19	Tetradecane	1508528	1.29728	15.3065	8.47537
D	Worker(M)	25	2,6,10,15-tetramethyl heptadecane	1613198	1.3873	15.3065	9.06344
D	Worker(M)	32	3,10-Dimethyltetradecane	1443024	1.24095	15.3065	8.10735
D	Worker(M)	34	4,6,10-Trimethyltridecane	289540	0.248995	15.3065	1.62672
D	Worker(M)	35	4,10-Dimethyltetradecane	335880	0.288846	15.3065	1.88708
D	Worker(M)	39	4,7-Dimethyltetradecane	482343	0.414799	15.3065	2.70995
D	Worker(M)	40	5,7-Dimethyl tetradecane	248164	0.213413	15.3065	1.39426
D	Worker(M)	41	Hexadecane	238125	0.20478	15.3065	1.33786
D	Worker(M)	48	5,9-Dimethylpentadecane	685384	0.589407	15.3065	3.8507
D	Worker(M)	71	Tricosane	1259232	1.0829	15.3065	7.07475
D	Worker(M)	72	11-Methyltricosane	85626	0.0736355	15.3065	0.481073
D	Worker(M)	73	2-methyltricosane	218840	0.188195	15.3065	1.22951
D	Worker(M)	75	Tetracosane	118199	0.101647	15.3065	0.664078
D	Worker(M)	77	11-Methyltetracosane	156897	0.134926	15.3065	0.881495
D	Worker(M)	79	5-Methyltetracosane	1105158	0.950399	15.3065	6.20912
D	Worker(M)	81	Pentacos-1-ene	207205	0.178189	15.3065	1.16414
D	Worker(M)	82	Pentacosane	1318542	1.1339	15.3065	7.40797
D	Worker(M)	83	11-Methylpentacosane	2506240	2.15528	15.3065	14.0808
D	Worker(M)	84	5,6,19-Trimethyltricosane	483737	0.415998	15.3065	2.71778
D	Worker(M)	88	3-Methylpentacosane	546520	0.469989	15.3065	3.07052
D	Worker(M)	89	5,8-Dimethyltetracosane	2392549	2.05751	15.3065	13.4421
D	Worker(M)	8	4,8-Dimethyldodecane	330832	0.284504
D	Worker(M)	11	Triacetin	225198	0.193663
D	Worker(M)	19	Tetradecane	1508528	1.29728
D	Worker(M)	25	2,6,10,15-tetramethyl heptadecane	1613198	1.3873
D	Worker(M)	32	3,10-Dimethyltetradecane	1443024	1.24095
D	Worker(M)	34	4,6,10-Trimethyltridecane	289540	0.248995
D	Worker(M)	35	4,10-Dimethyltetradecane	335880	0.288846
D	Worker(M)	39	4,7-Dimethyltetradecane	482343	0.414799
D	Worker(M)	40	5,7-Dimethyl tetradecane	248164	0.213413
D	Worker(M)	41	Hexadecane	238125	0.20478
D	Worker(M)	48	5,9-Dimethylpentadecane	685384	0.589407
D	Worker(M)	54	Octadecane (IS)	1162836	1
D	Worker(M)	71	Tricosane	1259232	1.0829
D	Worker(M)	72	11-Methyltricosane	85626	0.0736355
D	Worker(M)	73	2-methyltricosane	218840	0.188195
D	Worker(M)	75	Tetracosane	118199	0.101647
D	Worker(M)	77	11-Methyltetracosane	156897	0.134926
D	Worker(M)	79	5-Methyltetracosane	1105158	0.950399
D	Worker(M)	81	Pentacos-1-ene	207205	0.178189
D	Worker(M)	82	Pentacosane	1318542	1.1339
D	Worker(M)	83	11-Methylpentacosane	2506240	2.15528
D	Worker(M)	84	5,6,19-Trimethyltricosane	483737	0.415998
D	Worker(M)	88	3-Methylpentacosane	546520	0.469989
D	Worker(M)	89	5,8-Dimethyltetracosane	2392549	2.05751

## Sheet: Aggregation (C25)
colony	treatment	id	dummy	queen	soldier	worker
E	Negative	1_1	sample	3	2	1
E	Negative	1_1	solvent	0	0	2
E	Negative	1_2	sample	1	0	0
E	Negative	1_2	solvent	0	1	3
E	Negative	1_3	sample	0	1	0
E	Negative	1_3	solvent	0	0	1
E	Negative	1_4	sample	1	1	0
E	Negative	1_4	solvent	1	0	0
E	Negative	1_5	sample	0	0	0
E	Negative	1_5	solvent	0	0	0
E	C25(1ng)	1_1	sample	1	1	1
E	C25(1ng)	1_1	solvent	0	0	1
E	C25(1ng)	1_2	sample	0	0	1
E	C25(1ng)	1_2	solvent	0	2	0
E	C25(1ng)	1_3	sample	0	0	0
E	C25(1ng)	1_3	solvent	0	1	1
E	C25(1ng)	1_4	sample	0	0	2
E	C25(1ng)	1_4	solvent	2	2	0
E	C25(1ng)	1_5	sample	0	0	0
E	C25(1ng)	1_5	solvent	1	3	2
E	C25(10ng)	1_1	sample	0	2	0
E	C25(10ng)	1_1	solvent	0	0	0
E	C25(10ng)	1_2	sample	0	0	1
E	C25(10ng)	1_2	solvent	0	2	2
E	C25(10ng)	1_3	sample	0	1	1
E	C25(10ng)	1_3	solvent	0	1	2
E	C25(10ng)	1_4	sample	0	0	2
E	C25(10ng)	1_4	solvent	0	0	0
E	C25(10ng)	1_5	sample	0	0	0
E	C25(10ng)	1_5	solvent	0	1	0
E	C25(100ng)	1_1	sample	1	0	1
E	C25(100ng)	1_1	solvent	1	1	2
E	C25(100ng)	1_2	sample	0	0	2
E	C25(100ng)	1_2	solvent	1	2	2
E	C25(100ng)	1_3	sample	2	0	3
E	C25(100ng)	1_3	solvent	0	0	1
E	C25(100ng)	1_4	sample	0	0	1
E	C25(100ng)	1_4	solvent	2	2	2
E	C25(100ng)	1_5	sample	0	0	0
E	C25(100ng)	1_5	solvent	1	1	2
E	WE	1_1	sample	4	4	2
E	WE	1_1	solvent	0	0	0
E	WE	1_2	sample	1	1	2
E	WE	1_2	solvent	0	0	0
E	WE	1_3	sample	4	1	0
E	WE	1_3	solvent	0	0	0
E	WE	1_4	sample	0	0	1
E	WE	1_4	solvent	0	1	1
E	WE	1_5	sample	4	3	2
E	WE	1_5	solvent	0	0	0
E	WE+C25(1ng)	1_1	sample	2	2	2
E	WE+C25(1ng)	1_1	solvent	0	0	0
E	WE+C25(1ng)	1_2	sample	3	2	0
E	WE+C25(1ng)	1_2	solvent	0	0	0
E	WE+C25(1ng)	1_3	sample	3	0	3
E	WE+C25(1ng)	1_3	solvent	1	2	0
E	WE+C25(1ng)	1_4	sample	0	3	4
E	WE+C25(1ng)	1_4	solvent	0	0	0
E	WE+C25(1ng)	1_5	sample	0	1	2
E	WE+C25(1ng)	1_5	solvent	0	0	1
E	WE+C25(10ng)	1_1	sample	5	4	3
E	WE+C25(10ng)	1_1	solvent	0	1	0
E	WE+C25(10ng)	1_2	sample	5	4	2
E	WE+C25(10ng)	1_2	solvent	0	0	1
E	WE+C25(10ng)	1_3	sample	3	0	1
E	WE+C25(10ng)	1_3	solvent	0	1	0
E	WE+C25(10ng)	1_4	sample	1	1	2
E	WE+C25(10ng)	1_4	solvent	0	1	0
E	WE+C25(10ng)	1_5	sample	5	1	1
E	WE+C25(10ng)	1_5	solvent	0	0	1
E	WE+C25(100ng)	1_1	sample	2	2	1
E	WE+C25(100ng)	1_1	solvent	0	1	0
E	WE+C25(100ng)	1_2	sample	1	2	1
E	WE+C25(100ng)	1_2	solvent	0	1	0
E	WE+C25(100ng)	1_3	sample	3	2	1
E	WE+C25(100ng)	1_3	solvent	0	0	0
E	WE+C25(100ng)	1_4	sample	4	1	2
E	WE+C25(100ng)	1_4	solvent	0	1	0
E	WE+C25(100ng)	1_5	sample	2	0	4
E	WE+C25(100ng)	1_5	solvent	0	0	0
E	QE	1_1	sample	4	2	4
E	QE	1_1	solvent	1	0	0
E	QE	1_2	sample	4	4	3
E	QE	1_2	solvent	0	0	0
E	QE	1_3	sample	1	1	1
E	QE	1_3	solvent	0	1	1
E	QE	1_4	sample	0	4	4
E	QE	1_4	solvent	0	0	0
E	QE	1_5	sample	3	1	1
E	QE	1_5	solvent	0	0	0
F	Negative	2_1	sample	1	0	2
F	Negative	2_1	solvent	0	2	1
F	Negative	2_2	sample	1	2	0
F	Negative	2_2	solvent	0	1	0
F	Negative	2_3	sample	0	3	3
F	Negative	2_3	solvent	0	0	1
F	C25(1ng)	2_1	sample	0	0	0
F	C25(1ng)	2_1	solvent	3	0	2
F	C25(1ng)	2_2	sample	0	1	0
F	C25(1ng)	2_2	solvent	2	3	3
F	C25(1ng)	2_3	sample	0	2	0
F	C25(1ng)	2_3	solvent	0	1	2
F	C25(10ng)	2_1	sample	4	0	0
F	C25(10ng)	2_1	solvent	0	1	2
F	C25(10ng)	2_2	sample	0	0	0
F	C25(10ng)	2_2	solvent	1	0	2
F	C25(10ng)	2_3	sample	0	1	0
F	C25(10ng)	2_3	solvent	2	1	1
F	C25(100ng)	2_1	sample	2	1	0
F	C25(100ng)	2_1	solvent	0	0	0
F	C25(100ng)	2_2	sample	0	1	0
F	C25(100ng)	2_2	solvent	4	0	0
F	C25(100ng)	2_3	sample	0	0	0
F	C25(100ng)	2_3	solvent	0	1	2
F	WE	2_1	sample	2	2	1
F	WE	2_1	solvent	0	1	0
F	WE	2_2	sample	3	0	3
F	WE	2_2	solvent	0	1	0
F	WE	2_3	sample	2	3	0
F	WE	2_3	solvent	0	0	1
F	WE+C25(1ng)	2_1	sample	5	0	3
F	WE+C25(1ng)	2_1	solvent	0	0	0
F	WE+C25(1ng)	2_2	sample	5	1	4
F	WE+C25(1ng)	2_2	solvent	0	0	0
F	WE+C25(1ng)	2_3	sample	0	1	1
F	WE+C25(1ng)	2_3	solvent	2	1	3
F	WE+C25(10ng)	2_1	sample	2	0	2
F	WE+C25(10ng)	2_1	solvent	0	0	0
F	WE+C25(10ng)	2_2	sample	3	1	2
F	WE+C25(10ng)	2_2	solvent	0	2	0
F	WE+C25(10ng)	2_3	sample	5	2	4
F	WE+C25(10ng)	2_3	solvent	0	0	0
F	WE+C25(100ng)	2_1	sample	5	2	2
F	WE+C25(100ng)	2_1	solvent	0	0	0
F	WE+C25(100ng)	2_2	sample	2	3	3
F	WE+C25(100ng)	2_2	solvent	0	0	0
F	WE+C25(100ng)	2_3	sample	5	0	4
F	WE+C25(100ng)	2_3	solvent	0	2	0
F	QE	2_1	sample	5	1	2
F	QE	2_1	solvent	0	2	0
F	QE	2_2	sample	4	0	3
F	QE	2_2	solvent	0	0	1
F	QE	2_3	sample	3	1	3
F	QE	2_3	solvent	1	1	0
G	Negative	3-1	sample	0	0	1
G	Negative	3-1	solvent	2	1	1
G	Negative	3-2	sample	1	2	0
G	Negative	3-2	solvent	0	1	2
G	Negative	3-3	sample	0	2	1
G	Negative	3-3	solvent	0	1	1
G	Negative	3-4	sample	0	0	0
G	Negative	3-4	solvent	1	1	4
G	Negative	3-5	sample	0	1	2
G	Negative	3-5	solvent	1	1	1
G	C25(1ng)	3-1	sample	4	2	1
G	C25(1ng)	3-1	solvent	0	1	2
G	C25(1ng)	3-2	sample	1	2	0
G	C25(1ng)	3-2	solvent	2	1	2
G	C25(1ng)	3-3	sample	0	2	0
G	C25(1ng)	3-3	solvent	0	1	1
G	C25(1ng)	3-4	sample	0	1	3
G	C25(1ng)	3-4	solvent	4	0	0
G	C25(1ng)	3-5	sample	2	1	1
G	C25(1ng)	3-5	solvent	0	1	2
G	C25(10ng)	3-1	sample	1	2	2
G	C25(10ng)	3-1	solvent	0	0	0
G	C25(10ng)	3-2	sample	0	2	2
G	C25(10ng)	3-2	solvent	4	0	0
G	C25(10ng)	3-3	sample	1	0	1
G	C25(10ng)	3-3	solvent	0	1	2
G	C25(10ng)	3-4	sample	0	0	2
G	C25(10ng)	3-4	solvent	4	2	2
G	C25(10ng)	3-5	sample	1	1	0
G	C25(10ng)	3-5	solvent	1	1	2
G	C25(100ng)	3-1	sample	0	1	0
G	C25(100ng)	3-1	solvent	0	2	2
G	C25(100ng)	3-2	sample	0	0	0
G	C25(100ng)	3-2	solvent	4	1	3
G	C25(100ng)	3-3	sample	0	1	0
G	C25(100ng)	3-3	solvent	2	1	2
G	C25(100ng)	3-4	sample	0	2	1
G	C25(100ng)	3-4	solvent	3	1	1
G	C25(100ng)	3-5	sample	2	1	1
G	C25(100ng)	3-5	solvent	2	1	0
G	WE	3-1	sample	2	2	2
G	WE	3-1	solvent	0	0	0
G	WE	3-2	sample	2	0	2
G	WE	3-2	solvent	0	1	0
G	WE	3-3	sample	2	1	0
G	WE	3-3	solvent	0	1	1
G	WE	3-4	sample	3	1	0
G	WE	3-4	solvent	0	1	0
G	WE	3-5	sample	2	2	0
G	WE	3-5	solvent	2	2	2
G	WE+C25(1ng)	3-1	sample	2	1	0
G	WE+C25(1ng)	3-1	solvent	0	1	1
G	WE+C25(1ng)	3-2	sample	3	1	1
G	WE+C25(1ng)	3-2	solvent	1	2	1
G	WE+C25(1ng)	3-3	sample	2	1	1
G	WE+C25(1ng)	3-3	solvent	0	1	1
G	WE+C25(1ng)	3-4	sample	2	1	2
G	WE+C25(1ng)	3-4	solvent	0	1	0
G	WE+C25(1ng)	3-5	sample	2	2	2
G	WE+C25(1ng)	3-5	solvent	0	1	0
G	WE+C25(10ng)	3-1	sample	2	3	2
G	WE+C25(10ng)	3-1	solvent	0	0	1
G	WE+C25(10ng)	3-2	sample	4	1	4
G	WE+C25(10ng)	3-2	solvent	0	0	0
G	WE+C25(10ng)	3-3	sample	5	3	3
G	WE+C25(10ng)	3-3	solvent	0	0	0
G	WE+C25(10ng)	3-4	sample	3	2	3
G	WE+C25(10ng)	3-4	solvent	0	0	0
G	WE+C25(10ng)	3-5	sample	4	1	4
G	WE+C25(10ng)	3-5	solvent	0	1	0
G	WE+C25(100ng)	3-1	sample	2	1	0
G	WE+C25(100ng)	3-1	solvent	0	0	1
G	WE+C25(100ng)	3-2	sample	3	3	1
G	WE+C25(100ng)	3-2	solvent	0	0	0
G	WE+C25(100ng)	3-3	sample	1	2	1
G	WE+C25(100ng)	3-3	solvent	0	0	0
G	WE+C25(100ng)	3-4	sample	1	3	5
G	WE+C25(100ng)	3-4	solvent	0	0	0
G	WE+C25(100ng)	3-5	sample	2	0	1
G	WE+C25(100ng)	3-5	solvent	0	2	1
G	QE	3-1	sample	2	1	2
G	QE	3-1	solvent	0	1	1
G	QE	3-2	sample	2	1	2
G	QE	3-2	solvent	0	1	1
G	QE	3-3	sample	2	1	1
G	QE	3-3	solvent	1	1	1
G	QE	3-4	sample	2	0	3
G	QE	3-4	solvent	0	0	0
G	QE	3-5	sample	1	3	3
G	QE	3-5	solvent	0	0	1

## Sheet: Aggregation (C23)
colony	treatment	id	dummy	queen	soldier	worker
E	Negative	4_1	sample	2	1	0
E	Negative	4_1	solvent	0	1	1
E	Negative	4_2	sample	2	4	0
E	Negative	4_2	solvent	0	1	3
E	Negative	4_3	sample	3	3	3
E	Negative	4_3	solvent	0	1	2
E	Negative	4_4	sample	0	2	1
E	Negative	4_4	solvent	4	1	2
E	Negative	4_5	sample	2	2	0
E	Negative	4_5	solvent	2	2	4
E	C23(1ng)	4_1	sample	5	1	3
E	C23(1ng)	4_1	solvent	0	1	0
E	C23(1ng)	4_2	sample	1	4	4
E	C23(1ng)	4_2	solvent	3	1	0
E	C23(1ng)	4_3	sample	3	1	0
E	C23(1ng)	4_3	solvent	0	2	4
E	C23(1ng)	4_4	sample	1	0	2
E	C23(1ng)	4_4	solvent	1	1	3
E	C23(1ng)	4_5	sample	0	1	1
E	C23(1ng)	4_5	solvent	5	2	2
E	C23(10ng)	4_1	sample	4	1	0
E	C23(10ng)	4_1	solvent	0	2	4
E	C23(10ng)	4_2	sample	0	1	1
E	C23(10ng)	4_2	solvent	5	4	3
E	C23(10ng)	4_3	sample	0	0	1
E	C23(10ng)	4_3	solvent	2	1	1
E	C23(10ng)	4_4	sample	0	0	0
E	C23(10ng)	4_4	solvent	0	3	0
E	C23(10ng)	4_5	sample	0	0	0
E	C23(10ng)	4_5	solvent	5	3	4
E	C23(100ng)	4_1	sample	0	1	1
E	C23(100ng)	4_1	solvent	1	1	2
E	C23(100ng)	4_2	sample	2	1	1
E	C23(100ng)	4_2	solvent	0	2	2
E	C23(100ng)	4_3	sample	2	1	2
E	C23(100ng)	4_3	solvent	1	1	0
E	C23(100ng)	4_4	sample	0	0	0
E	C23(100ng)	4_4	solvent	1	0	1
E	C23(100ng)	4_5	sample	0	1	1
E	C23(100ng)	4_5	solvent	5	1	1
E	WE	4_1	sample	2	2	3
E	WE	4_1	solvent	0	1	0
E	WE	4_2	sample	1	3	5
E	WE	4_2	solvent	0	0	0
E	WE	4_3	sample	4	2	1
E	WE	4_3	solvent	0	1	1
E	WE	4_4	sample	4	3	1
E	WE	4_4	solvent	0	0	1
E	WE	4_5	sample	2	2	0
E	WE	4_5	solvent	0	1	1
E	WE+C23(1ng)	4_1	sample	2	1	1
E	WE+C23(1ng)	4_1	solvent	0	0	0
E	WE+C23(1ng)	4_2	sample	4	0	3
E	WE+C23(1ng)	4_2	solvent	0	2	1
E	WE+C23(1ng)	4_3	sample	1	1	1
E	WE+C23(1ng)	4_3	solvent	4	4	3
E	WE+C23(1ng)	4_4	sample	2	3	0
E	WE+C23(1ng)	4_4	solvent	0	0	1
E	WE+C23(1ng)	4_5	sample	3	0	3
E	WE+C23(1ng)	4_5	solvent	0	2	0
E	WE+C23(10ng)	4_1	sample	3	0	1
E	WE+C23(10ng)	4_1	solvent	0	2	1
E	WE+C23(10ng)	4_2	sample	3	2	3
E	WE+C23(10ng)	4_2	solvent	0	0	0
E	WE+C23(10ng)	4_3	sample	3	2	1
E	WE+C23(10ng)	4_3	solvent	0	0	2
E	WE+C23(10ng)	4_4	sample	1	0	2
E	WE+C23(10ng)	4_4	solvent	0	0	0
E	WE+C23(10ng)	4_5	sample	3	3	3
E	WE+C23(10ng)	4_5	solvent	0	0	0
E	WE+C23(100ng)	4_1	sample	2	1	2
E	WE+C23(100ng)	4_1	solvent	0	0	0
E	WE+C23(100ng)	4_2	sample	4	2	2
E	WE+C23(100ng)	4_2	solvent	0	1	2
E	WE+C23(100ng)	4_3	sample	0	1	2
E	WE+C23(100ng)	4_3	solvent	2	2	2
E	WE+C23(100ng)	4_4	sample	4	3	1
E	WE+C23(100ng)	4_4	solvent	0	0	0
E	WE+C23(100ng)	4_5	sample	5	0	2
E	WE+C23(100ng)	4_5	solvent	0	0	0
G	Negative	5_1	sample	2	1	3
G	Negative	5_1	solvent	1	2	1
G	Negative	5_2	sample	1	2	4
G	Negative	5_2	solvent	1	2	1
G	Negative	5_3	sample	4	0	2
G	Negative	5_3	solvent	0	2	1
G	Negative	5_4	sample	3	2	2
G	Negative	5_4	solvent	1	1	3
G	Negative	5_5	sample	0	2	1
G	Negative	5_5	solvent	1	1	1
G	C23(1ng)	5_1	sample	0	0	1
G	C23(1ng)	5_1	solvent	1	2	3
G	C23(1ng)	5_2	sample	0	0	2
G	C23(1ng)	5_2	solvent	2	2	1
G	C23(1ng)	5_3	sample	0	0	0
G	C23(1ng)	5_3	solvent	3	1	2
G	C23(1ng)	5_4	sample	0	0	3
G	C23(1ng)	5_4	solvent	2	2	1
G	C23(1ng)	5_5	sample	0	0	0
G	C23(1ng)	5_5	solvent	2	1	1
G	C23(10ng)	5_1	sample	0	0	0
G	C23(10ng)	5_1	solvent	0	0	3
G	C23(10ng)	5_2	sample	0	2	0
G	C23(10ng)	5_2	solvent	2	0	1
G	C23(10ng)	5_3	sample	4	1	1
G	C23(10ng)	5_3	solvent	0	0	1
G	C23(10ng)	5_4	sample	0	0	2
G	C23(10ng)	5_4	solvent	2	1	0
G	C23(10ng)	5_5	sample	0	0	0
G	C23(10ng)	5_5	solvent	0	4	0
G	C23(100ng)	5_1	sample	0	0	0
G	C23(100ng)	5_1	solvent	1	1	3
G	C23(100ng)	5_2	sample	2	1	2
G	C23(100ng)	5_2	solvent	1	2	1
G	C23(100ng)	5_3	sample	1	0	1
G	C23(100ng)	5_3	solvent	2	0	2
G	C23(100ng)	5_4	sample	0	2	2
G	C23(100ng)	5_4	solvent	0	1	1
G	C23(100ng)	5_5	sample	0	1	1
G	C23(100ng)	5_5	solvent	5	1	3
G	WE	5_1	sample	2	4	1
G	WE	5_1	solvent	0	0	0
G	WE	5_2	sample	0	1	0
G	WE	5_2	solvent	0	1	0
G	WE	5_3	sample	1	0	2
G	WE	5_3	solvent	0	0	0
G	WE	5_4	sample	1	1	0
G	WE	5_4	solvent	0	0	0
G	WE	5_5	sample	1	1	3
G	WE	5_5	solvent	0	1	0
G	WE+C23(1ng)	5_1	sample	5	1	1
G	WE+C23(1ng)	5_1	solvent	0	0	0
G	WE+C23(1ng)	5_2	sample	2	3	3
G	WE+C23(1ng)	5_2	solvent	0	1	0
G	WE+C23(1ng)	5_3	sample	3	3	1
G	WE+C23(1ng)	5_3	solvent	0	0	0
G	WE+C23(1ng)	5_4	sample	1	0	1
G	WE+C23(1ng)	5_4	solvent	0	1	1
G	WE+C23(1ng)	5_5	sample	0	0	0
G	WE+C23(1ng)	5_5	solvent	0	1	2
G	WE+C23(10ng)	5_1	sample	1	2	1
G	WE+C23(10ng)	5_1	solvent	0	0	3
G	WE+C23(10ng)	5_2	sample	3	0	4
G	WE+C23(10ng)	5_2	solvent	0	1	0
G	WE+C23(10ng)	5_3	sample	3	2	2
G	WE+C23(10ng)	5_3	solvent	0	0	0
G	WE+C23(10ng)	5_4	sample	2	2	3
G	WE+C23(10ng)	5_4	solvent	0	0	0
G	WE+C23(10ng)	5_5	sample	3	1	1
G	WE+C23(10ng)	5_5	solvent	0	1	0
G	WE+C23(100ng)	5_1	sample	4	0	0
G	WE+C23(100ng)	5_1	solvent	1	0	1
G	WE+C23(100ng)	5_2	sample	4	1	4
G	WE+C23(100ng)	5_2	solvent	0	1	0
G	WE+C23(100ng)	5_3	sample	5	2	2
G	WE+C23(100ng)	5_3	solvent	0	1	0
G	WE+C23(100ng)	5_4	sample	1	0	4
G	WE+C23(100ng)	5_4	solvent	0	0	0
G	WE+C23(100ng)	5_5	sample	5	1	4
G	WE+C23(100ng)	5_5	solvent	0	0	0
